# Supplementary material for: Comparative Transcriptome Analysis of Two Aegilops tauschii with Contrasting Drought Tolerance by RNA-Seq
Source: MDPI journal article supplement (doi:10.3390/ijms21103595), 2020-05-19
Supplement: s1 [file s1]

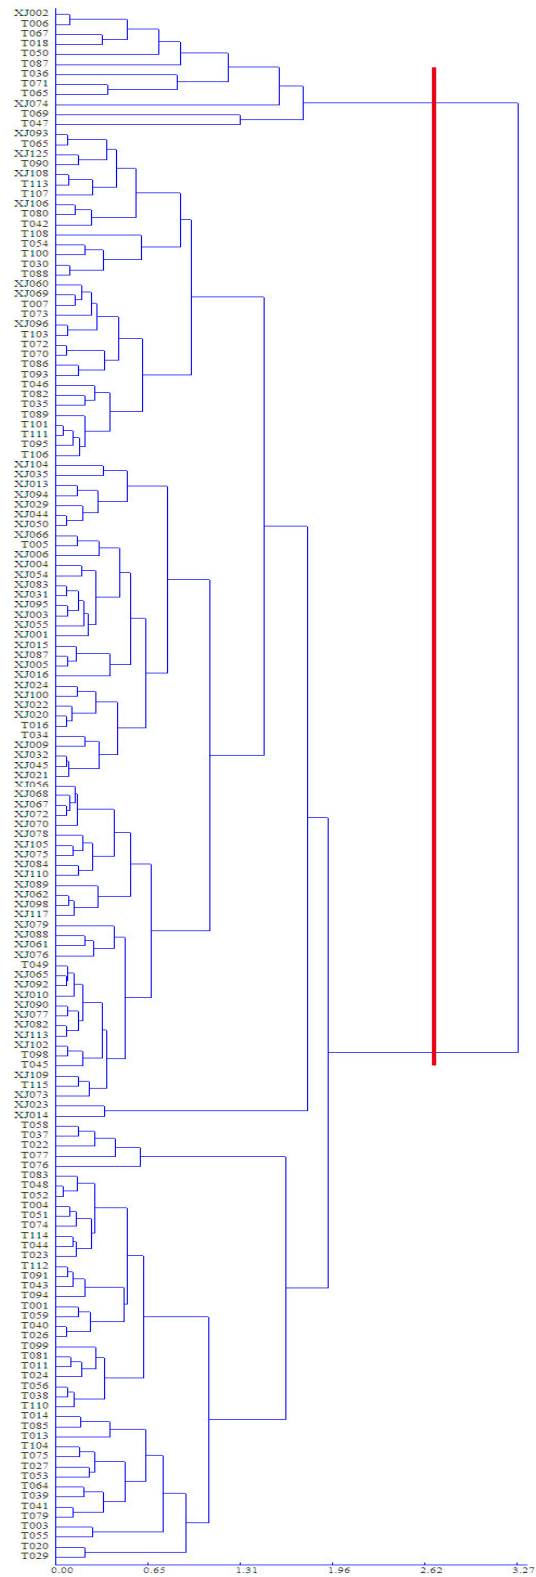

Figure S1 Cluster tree of coleoptile lengths from 155 *Ae. tauschii* accessions acquired through the method of unweighted pairgroup method with arithmetic means (UPGMA) according to Euclidean distances.

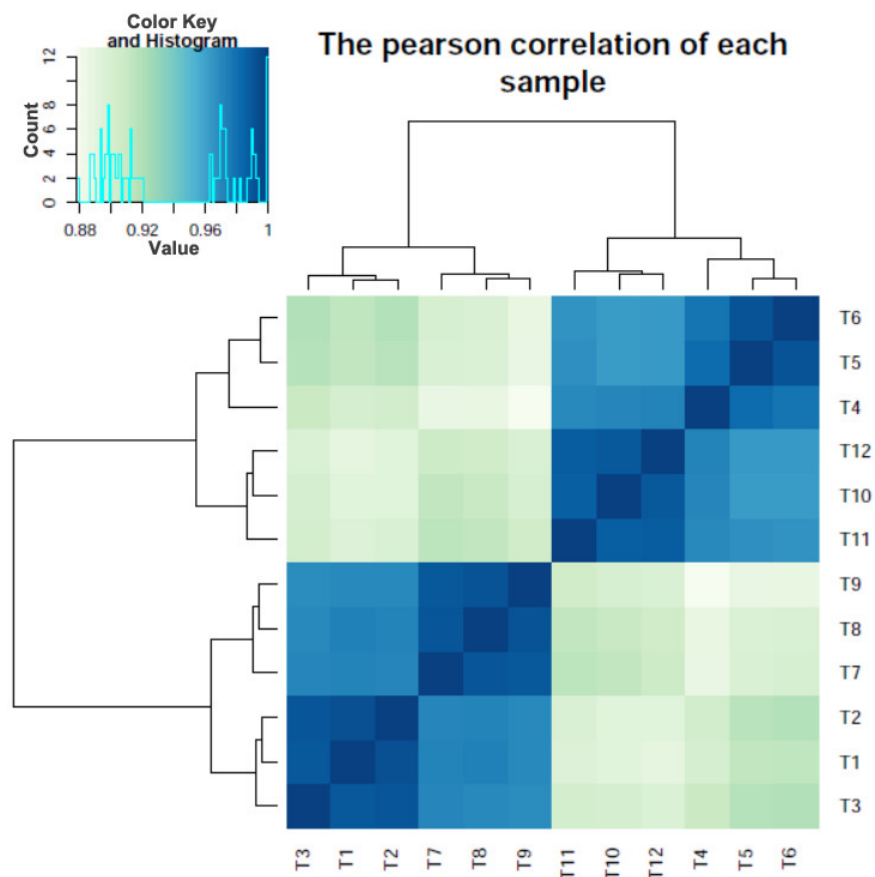

Figure. S2 Pearson correlation coefficients among 3 biological replications from XJ002 and XJ098 under the control and drought stresses. The numbers in the scale bar stand for correlation coefficients. XJ002-control: T1, T2, T3; XJ002-treatment: T4, T5, T6; XJ098-control: T7, T8, T9; XJ098- treatment: T10, T11, T12.

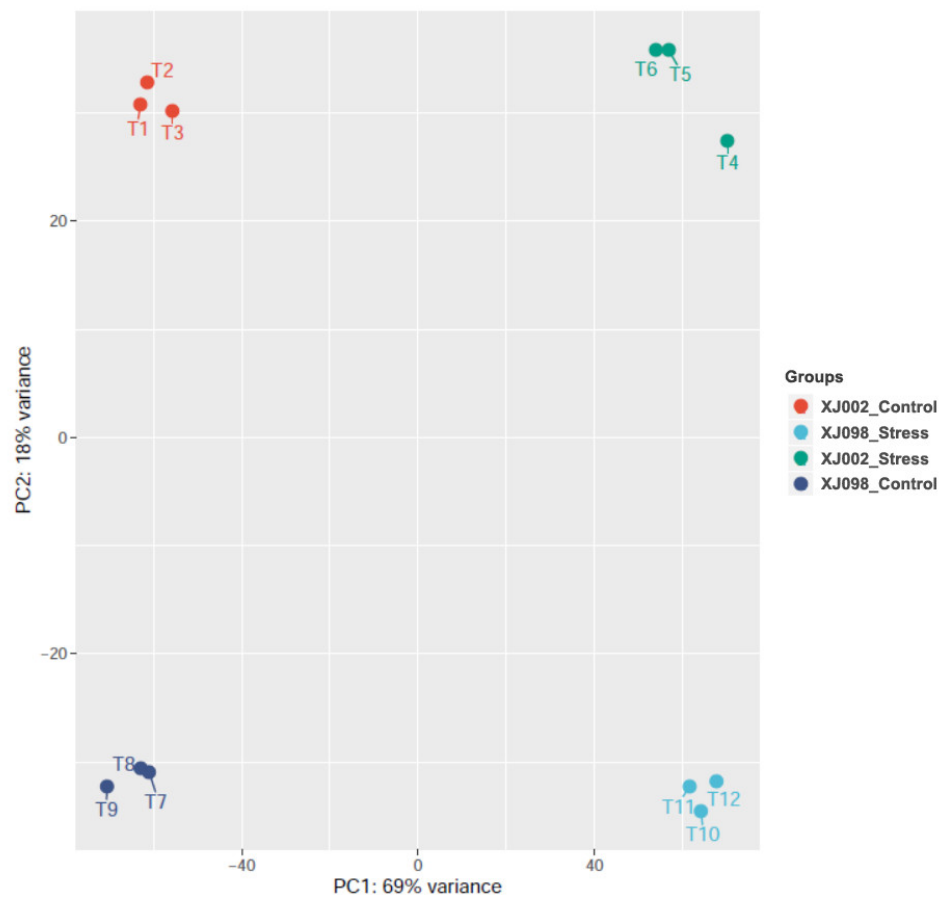

Figure S3 Principal component analysis among 3 biological replications from XJ002 and XJ098 under the control and drought stresses.

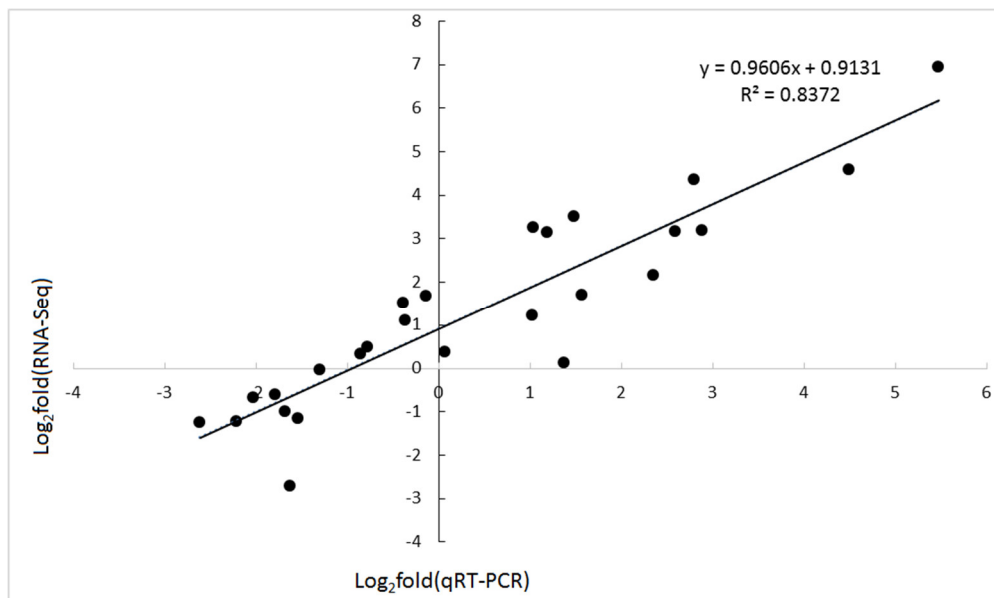

Figure S4 Reliability of DEGs validated by RNA-Seq and quantitative real-time PCR.
